# Supplementary material for: Evaluation of the expression levels of BRAFV600E mRNA in primary tumors of thyroid cancer using an ultrasensitive mutation assay
Source: Springer Nature journal article supplement (doi:10.1186/s12885-020-06862-w), 2020-05-01
Supplement: MOESM1 [file 17948210]

**Table S1.** Clinicopathologic and molecular data of novel mRNA-based assay and Sanger sequencing for *BRAF*<sup>V600E</sup> expression of thyroid cancer cases.

| Case No. | Sex | Tumor type | Molecular data                      |                  |                         |                  |                                           |
|----------|-----|------------|-------------------------------------|------------------|-------------------------|------------------|-------------------------------------------|
|          |     |            | Novel mRNA-based assay <sup>b</sup> |                  | Sequencing <sup>c</sup> |                  | Log (R <sup>RNA</sup> /R <sup>DNA</sup> ) |
|          |     |            | ΔCt (mt-wt)                         | R <sup>RNA</sup> | nt 1799                 | R <sup>DNA</sup> |                                           |
| 1        | 1   | Malignant  | 2.58                                | 0.16724          | 1799T>A                 | 0.703            | -0.623                                    |
| 2        | 1   | Malignant  | 5.71                                | 0.0191           | 1799T>A                 | 0.6              | -1.497                                    |
| 3        | 1   | Malignant  | 4.97                                | 0.03191          | 1799T>A                 | 0.48             | -1.177                                    |
| 4        | 1   | Malignant  | 1.22                                | 0.42928          | 1799T>A                 | 0.378            | 0.056                                     |
| 5        | 1   | Malignant  | 1.81                                | 0.28519          | 1799T>A                 | 0.368            | -0.11                                     |
| 6        | 1   | Malignant  | 2.84                                | 0.13966          | 1799T>A                 | 0.313            | -0.35                                     |
| 7        | 2   | Malignant  | 10                                  | 0.00098          | 1799T>A                 | 0.295            | -2.48                                     |
| 8        | 1   | Malignant  | 2.15                                | 0.22531          | 1799T>A                 | 0.28             | -0.094                                    |
| 9        | 1   | Malignant  | 4.87                                | 0.0342           | 1799T>A                 | 0.265            | -0.889                                    |
| 10       | 1   | Malignant  | 4.35                                | 0.04904          | 1799T>A                 | 0.228            | -0.666                                    |
| 11       | 1   | Malignant  | 1.41                                | 0.37631          | 1799T>A                 | 0.208            | 0.259                                     |
| 12       | 1   | Malignant  | 6.56                                | 0.0106           | 1799T>A                 | 0.178            | -1.224                                    |
| 13       | 1   | Malignant  | 3                                   | 0.125            | 1799T>A                 | 0.17             | -0.134                                    |
| 14       | 2   | Malignant  | 2.38                                | 0.19211          | 1799T                   | 0                | n.a.                                      |
| 15       | 1   | Malignant  | 4.08                                | 0.05913          | 1799T                   | 0                | n.a.                                      |
| 16       | 1   | Malignant  | 6.52                                | 0.0109           | 1799T                   | 0                | n.a.                                      |
| 17       | 1   | Malignant  | 7.62                                | 0.00508          | 1799T                   | 0                | n.a.                                      |
| 18       | 1   | Malignant  | 8.15                                | 0.00352          | 1799T                   | 0                | n.a.                                      |
| 19       | 1   | Malignant  | wt                                  | 0                | 1799T                   | 0                | n.a.                                      |
| 20       | 1   | Malignant  | wt                                  | 0                | 1799T                   | 0                | n.a.                                      |
| 21       | 1   | Malignant  | wt                                  | 0                | 1799T                   | 0                | n.a.                                      |
| 22       | 1   | Malignant  | wt                                  | 0                | 1799T                   | 0                | n.a.                                      |
| 23       | 1   | Malignant  | wt                                  | 0                | 1799T                   | 0                | n.a.                                      |
| 24       | 1   | Malignant  | wt                                  | 0                | 1799T                   | 0                | n.a.                                      |
| 25       | 1   | Malignant  | wt                                  | 0                | 1799T                   | 0                | n.a.                                      |
| 26       | 1   | Malignant  | wt                                  | 0                | 1799T                   | 0                | n.a.                                      |
| 27       | 1   | Malignant  | wt                                  | 0                | 1799T                   | 0                | n.a.                                      |
| 28       | 1   | Malignant  | wt                                  | 0                | 1799T                   | 0                | n.a.                                      |
| 29       | 1   | Malignant  | wt                                  | 0                | 1799T                   | 0                | n.a.                                      |
| 30       | 1   | Malignant  | wt                                  | 0                | 1799T                   | 0                | n.a.                                      |
| 31       | 1   | Malignant  | wt                                  | 0                | 1799T                   | 0                | n.a.                                      |
| 32       | 1   | Malignant  | wt                                  | 0                | 1799T                   | 0                | n.a.                                      |
| 33       | 1   | Benign     | wt                                  | 0                | 1799T                   | 0                | n.a.                                      |
| 34       | 1   | Benign     | wt                                  | 0                | 1799T                   | 0                | n.a.                                      |
| 35       | 2   | Benign     | wt                                  | 0                | 1799T                   | 0                | n.a.                                      |
| 36       | 1   | Benign     | wt                                  | 0                | 1799T                   | 0                | n.a.                                      |
| 37       | 1   | Benign     | wt                                  | 0                | 1799T                   | 0                | n.a.                                      |
| 38       | 2   | Benign     | wt                                  | 0                | 1799T                   | 0                | n.a.                                      |
| 39       | 1   | Benign     | wt                                  | 0                | 1799T                   | 0                | n.a.                                      |
| 40       | 1   | Benign     | wt                                  | 0                | 1799T                   | 0                | n.a.                                      |

|    |   |        |    |   |       |   |      |
|----|---|--------|----|---|-------|---|------|
| 41 | 1 | Benign | wt | 0 | 1799T | 0 | n.a. |
| 42 | 1 | Benign | wt | 0 | 1799T | 0 | n.a. |
| 43 | 2 | Benign | wt | 0 | 1799T | 0 | n.a. |
| 44 | 2 | Benign | wt | 0 | 1799T | 0 | n.a. |
| 45 | 1 | Benign | wt | 0 | 1799T | 0 | n.a. |
| 46 | 1 | Benign | wt | 0 | 1799T | 0 | n.a. |
| 47 | 1 | Benign | wt | 0 | 1799T | 0 | n.a. |
| 48 | 1 | Benign | wt | 0 | 1799T | 0 | n.a. |
| 49 | 1 | Benign | wt | 0 | 1799T | 0 | n.a. |
| 50 | 1 | Benign | wt | 0 | 1799T | 0 | n.a. |
| 51 | 1 | Benign | wt | 0 | 1799T | 0 | n.a. |
| 52 | 1 | Benign | wt | 0 | 1799T | 0 | n.a. |
| 53 | 1 | Benign | wt | 0 | 1799T | 0 | n.a. |
| 54 | 1 | Benign | wt | 0 | 1799T | 0 | n.a. |
| 55 | 1 | Benign | wt | 0 | 1799T | 0 | n.a. |
| 56 | 1 | Benign | wt | 0 | 1799T | 0 | n.a. |
| 57 | 1 | Benign | wt | 0 | 1799T | 0 | n.a. |
| 58 | 1 | Benign | wt | 0 | 1799T | 0 | n.a. |
| 59 | 1 | Benign | wt | 0 | 1799T | 0 | n.a. |
| 60 | 2 | Benign | wt | 0 | 1799T | 0 | n.a. |
| 61 | 1 | Benign | wt | 0 | 1799T | 0 | n.a. |
| 62 | 1 | Benign | wt | 0 | 1799T | 0 | n.a. |

<sup>a</sup>All cases were diagnosed with differentiated thyroid cancer.

<sup>b</sup>Novel mRNA-based assay was used to calculate the relative abundance of mutant versus wildtype allele at the mRNA level using the delta Ct value ( $\Delta Ct$ ) between the mutant and wildtype signals:  $R^{RNA} = 1/2^{\Delta Ct(BRAF^{V600E} - BRAF \text{ wildtype})}$ .

<sup>c</sup>Sanger sequencing was used to calculate the relative abundance of mutant versus wildtype allele at the DNA level using the peak heights (H) at the nucleotide position of interest (1799T>A) on a DS chromatogram:  $R^{DNA} = H^{BRAF^{V600E}} / H^{BRAF^{wildtype}}$ .  
wt: wild-type; mt: mutant; n.a: no applicable.
