# Supplementary material for: Evaluation of the expression levels of BRAFV600E mRNA in primary tumors of thyroid cancer using an ultrasensitive mutation assay
Source: Springer Nature journal article supplement (doi:10.1186/s12885-020-06862-w), 2020-05-01
Supplement: MOESM2 [file 17948210]

**Table S2.** Improvements of current mRNA-based mutation assay in comparison to the original assay of Extendable blocking probe – reverse transcription (ExBP-RT).

|                                               | <b>Current mRNA-based mutation assay (1)</b>                                                                  | <b>Original ExBP-RT (2)</b>                                                          | <b>Advantages of (1) compared to (2)</b>                         |
|-----------------------------------------------|---------------------------------------------------------------------------------------------------------------|--------------------------------------------------------------------------------------|------------------------------------------------------------------|
| <b>Reverse enzyme</b>                         | Warm-start reverse transcriptase that enables the manipulation of closed tube reverse transcription reactions | Manual hot-start reverse transcriptase via opening the tube on the heating block     | More convenient for assay handling in routine clinical settings  |
| <b>Design of the mutation-specific primer</b> | A new design of the mutation-specific primer with a shorter 5'-tail sequence (10 nucleotides in length)       | The mutation-specific primer with a long 5'-tail sequence (24 nucleotides in length) | For higher sensitivity and improved specificity                  |
| <b>Sensitivity (%)</b>                        | 0.005                                                                                                         | 0.017                                                                                | More sensitive in detection of <i>BRAF</i> <sup>V600E</sup> mRNA |
